# Supplementary material for: Construction of a phosphorus-based integrated electrode for efficient and durable seawater splitting at a large current density
Source: Royal Society of Chemistry journal article supplement (doi:10.1039/d3qi02222f), 2023-12-28
Supplement: d3qi02222f1.pdf [file d3qi02222f1.pdf]

## Supporting Information

### **Mild construction phosphorus-based “integrated” electrode for efficient and durable seawater splitting at large current density**

Jiajing Xia<sup>a#</sup>, LuJia Zhang<sup>a#</sup>, Yizhou Wang<sup>b</sup>, Weiju Hao<sup>a\*</sup>

<sup>a</sup> University of Shanghai for Science and Technology, Shanghai 200093, PR China.

<sup>b</sup> Hubei Key Laboratory of Energy Storage and Power Battery, School of Mathematics, Physics and Optoelectronic Engineering, Hubei University of Automotive Technology, Shiyan 442002, PR China.

# The authors are equal to this work.

E-mail: [wjhao@usst.edu.cn](mailto:wjhao@usst.edu.cn)

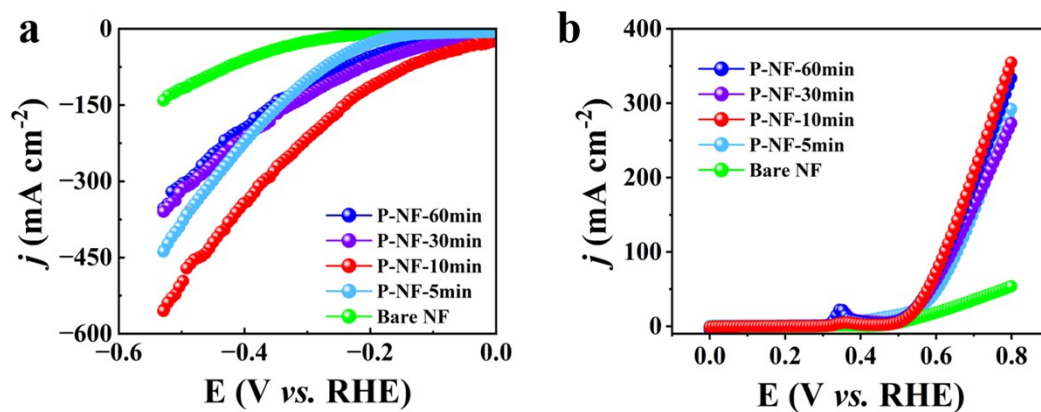

**Figure S1** LSV curves of P-NF with different plating time (a) during HER process and (b) during OER process in 1.0 M KOH + 0.5 M NaCl.

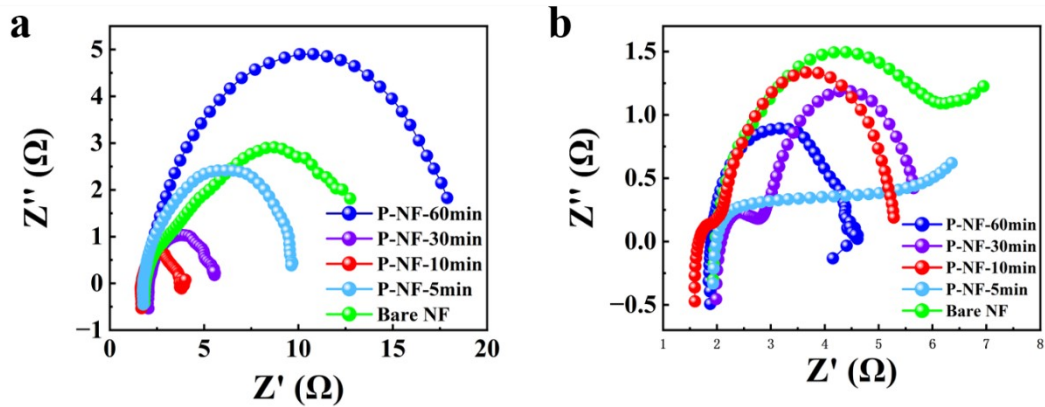

**Figure S2** EIS curves of P-NF with different plating time (a) during HER process and (b) during OER process in 1.0 M KOH + 0.5 M NaCl.

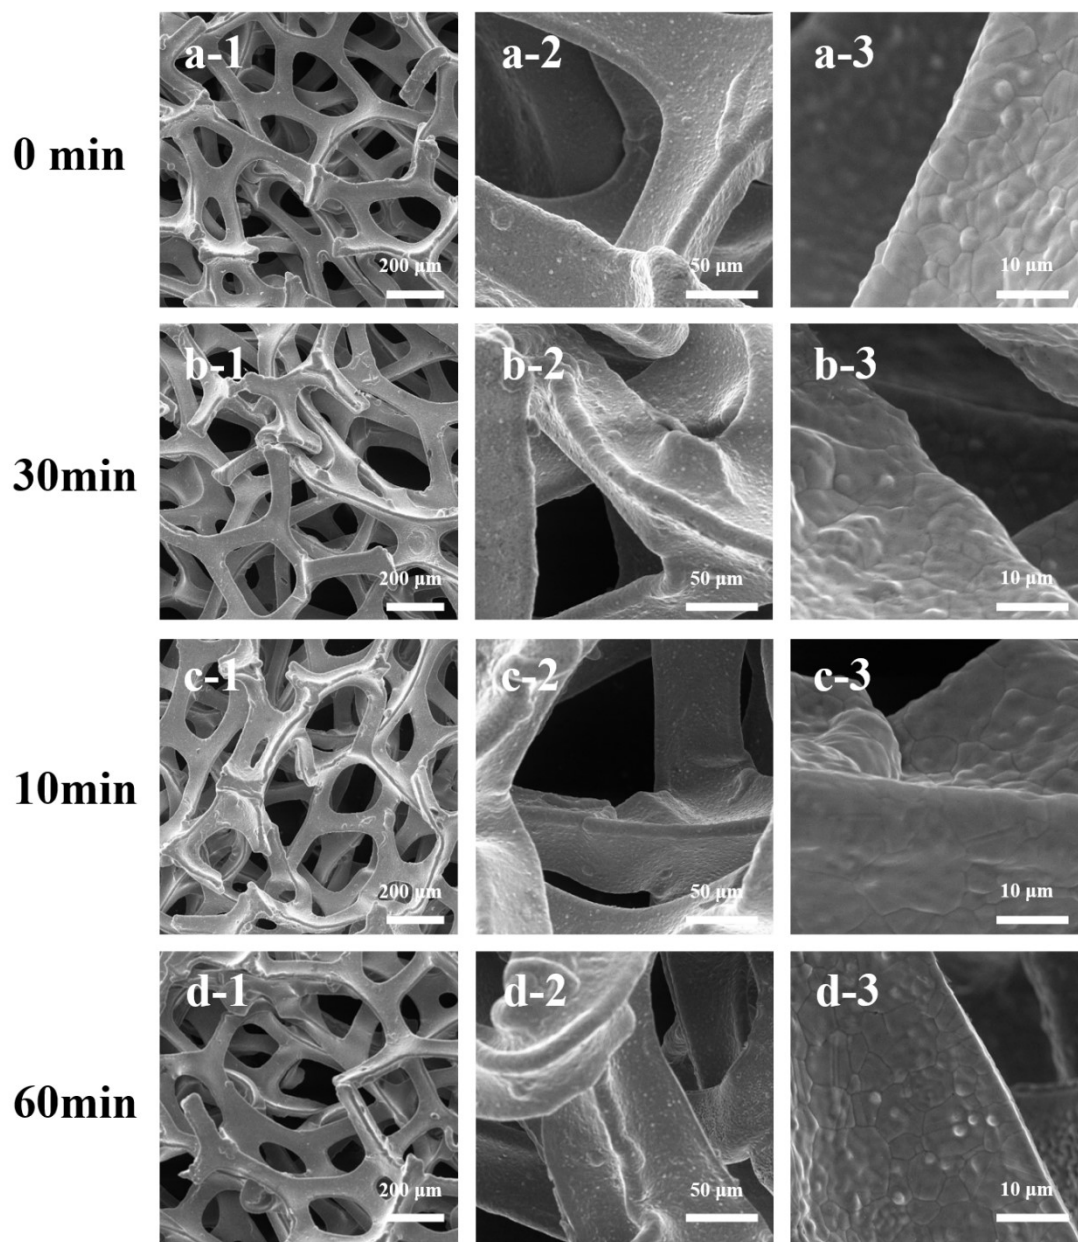

Figure S3 SEM images of P-NF with different reaction time (0, 30, 10 and 60 min).

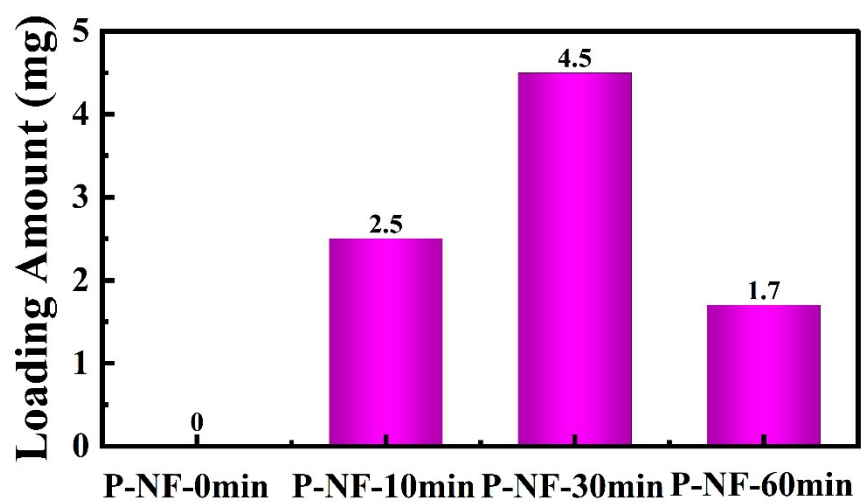

**Figure S4** The loading amount of  $\text{NaH}_2\text{PO}_2$  on NF substrate with different electroless plating time.

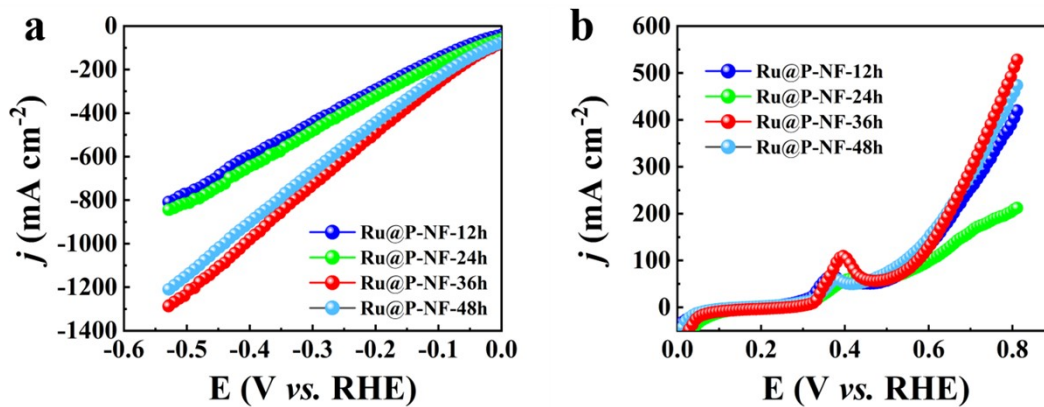

**Figure S5** LSV curves of Ru@P-NF with different plating time (a) during HER process and (b) during OER process in 1.0 M KOH + 0.5 M NaCl.

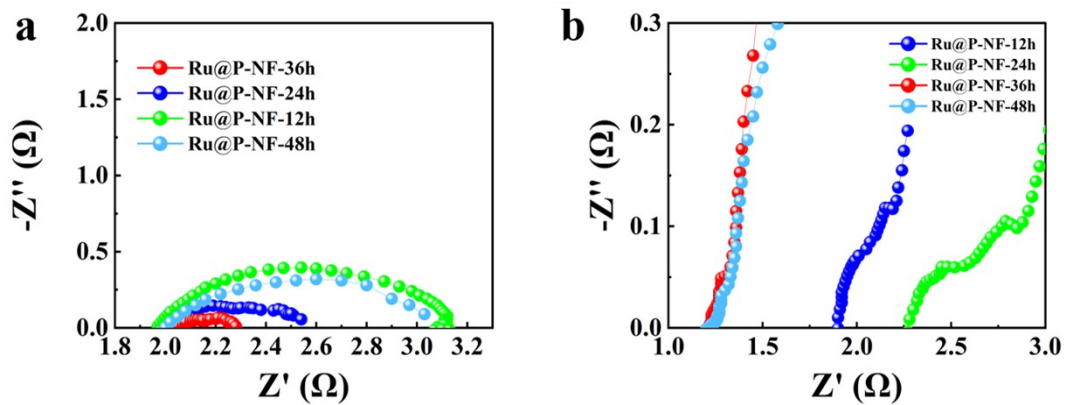

**Figure S6** EIS curves of Ru@P-NF with different plating time (a) during HER process and (b) during OER process in 1.0 M KOH + 0.5 M NaCl.

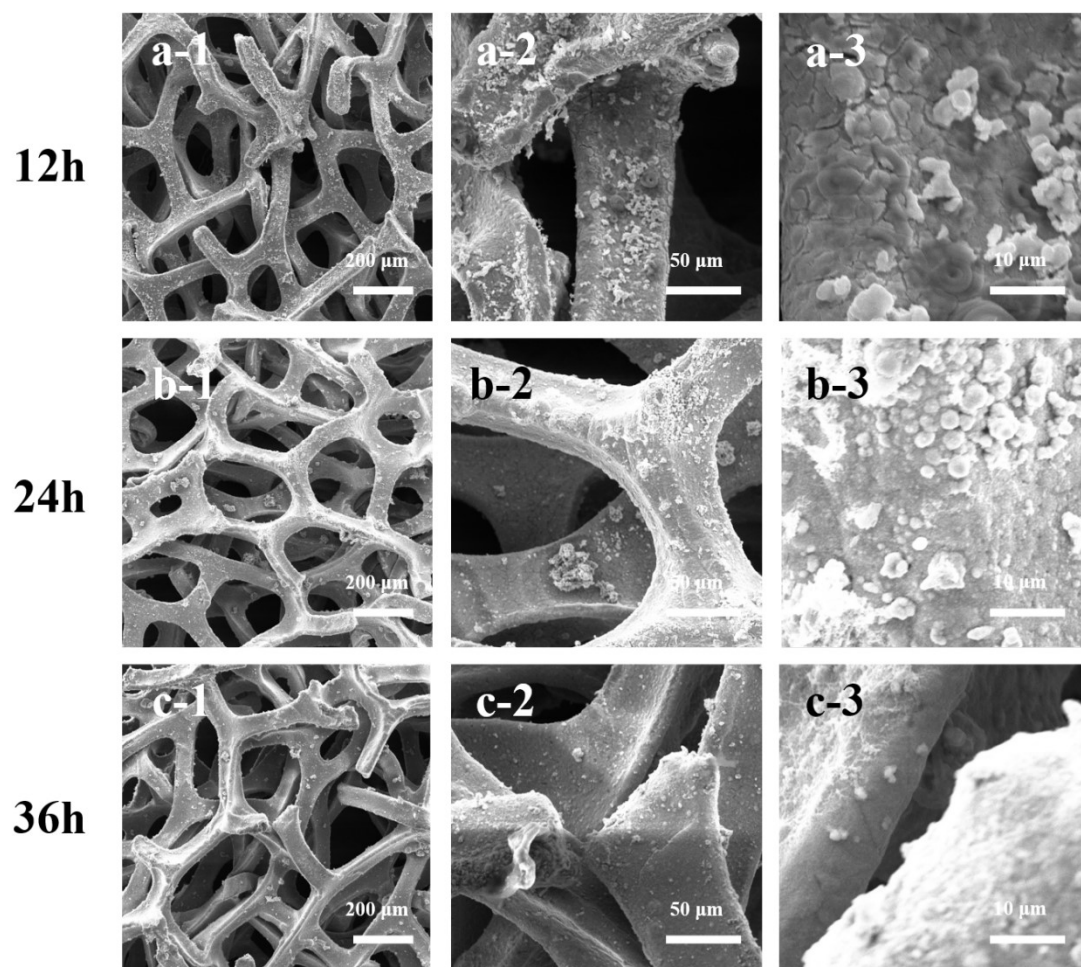

**Figure S7** SEM images of Ru@P-NF with different reaction time (12, 24 and 36 h).



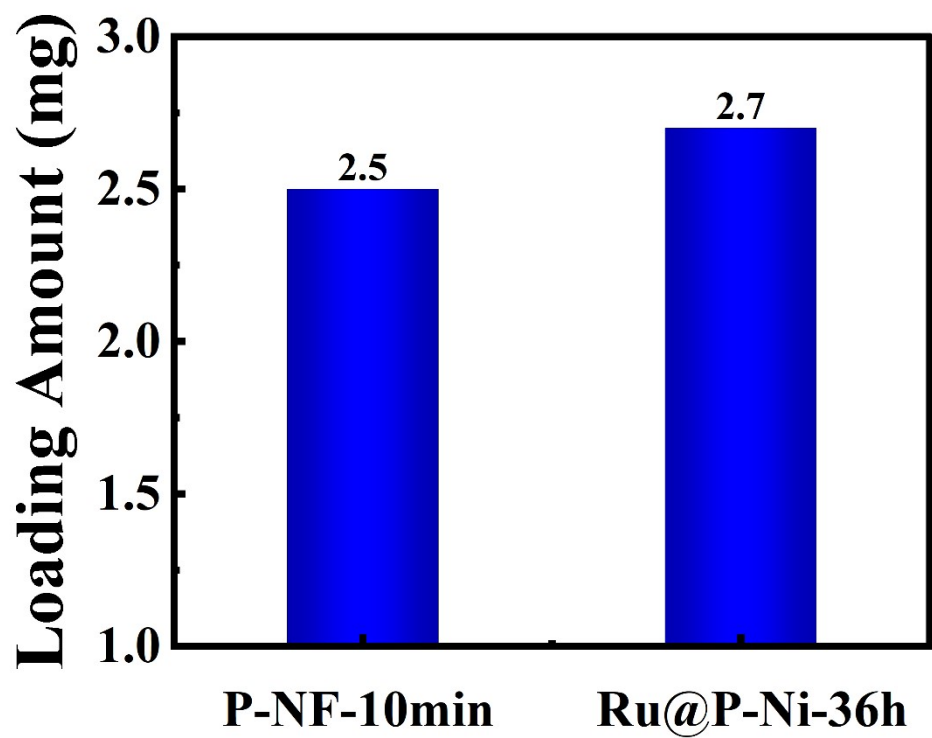

**Figure S8** The loading amount of RuCl<sub>3</sub> on P-NF at 10 min and 36 h.

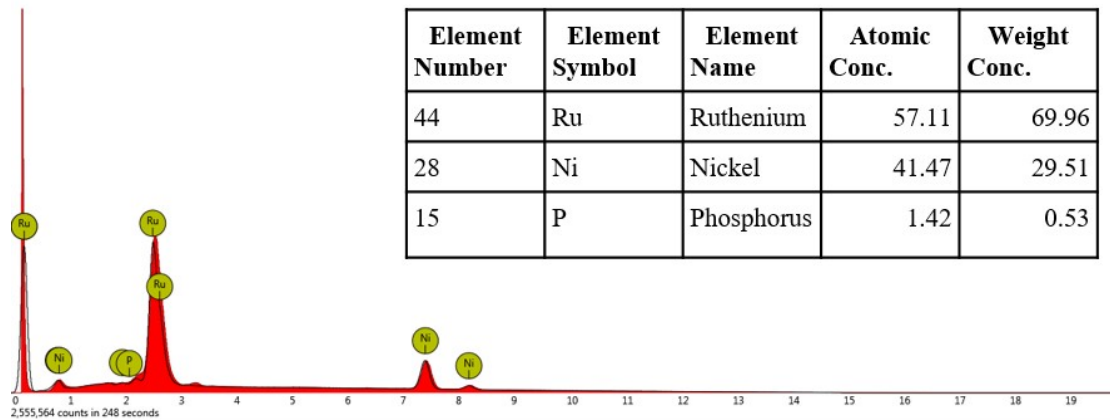

**Figure S9** EDS elemental mapping of Ru, Ni and P on the surface.

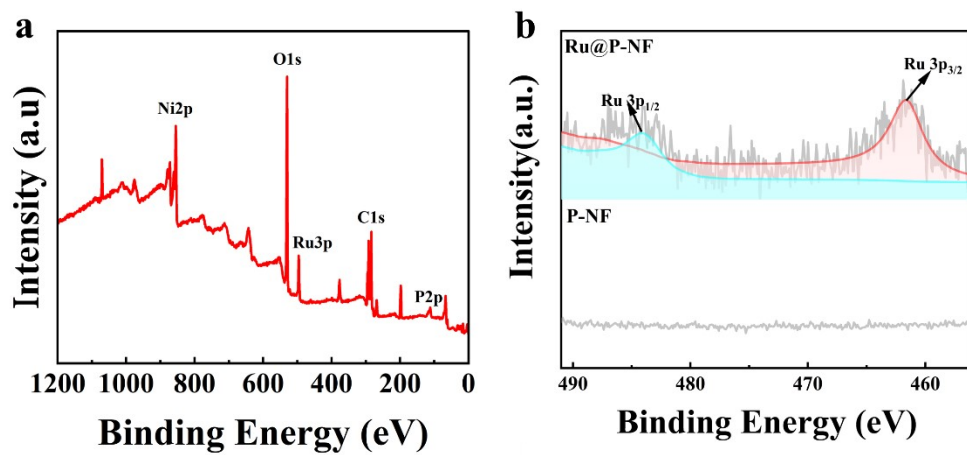

**Figure S10** (a) XPS survey spectra of Ru@P-NF. (b) X-ray Photoelectron Spectroscopy for Ru@P-NF and P-NF of Ru 3p orbit.

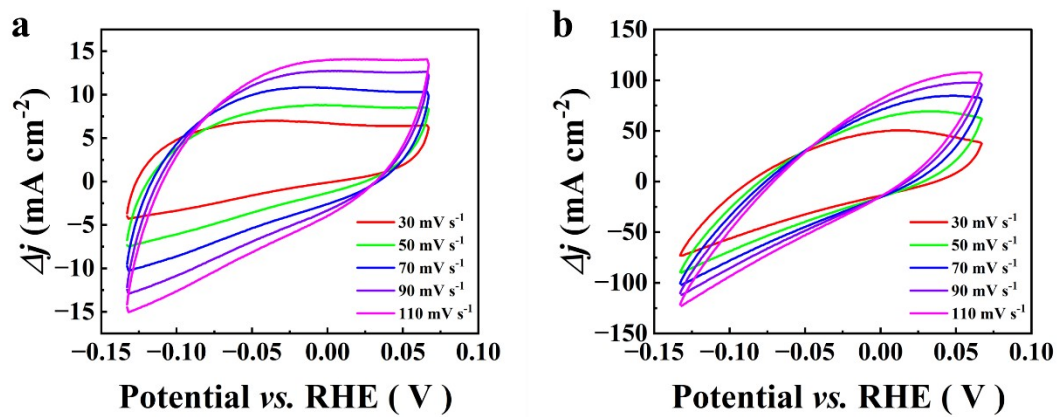

**Figure S11** CV curves within a non-faradaic reaction region at different scan rates toward HER process for (a) P-NF and (b) Ru@P-NF electrodes.

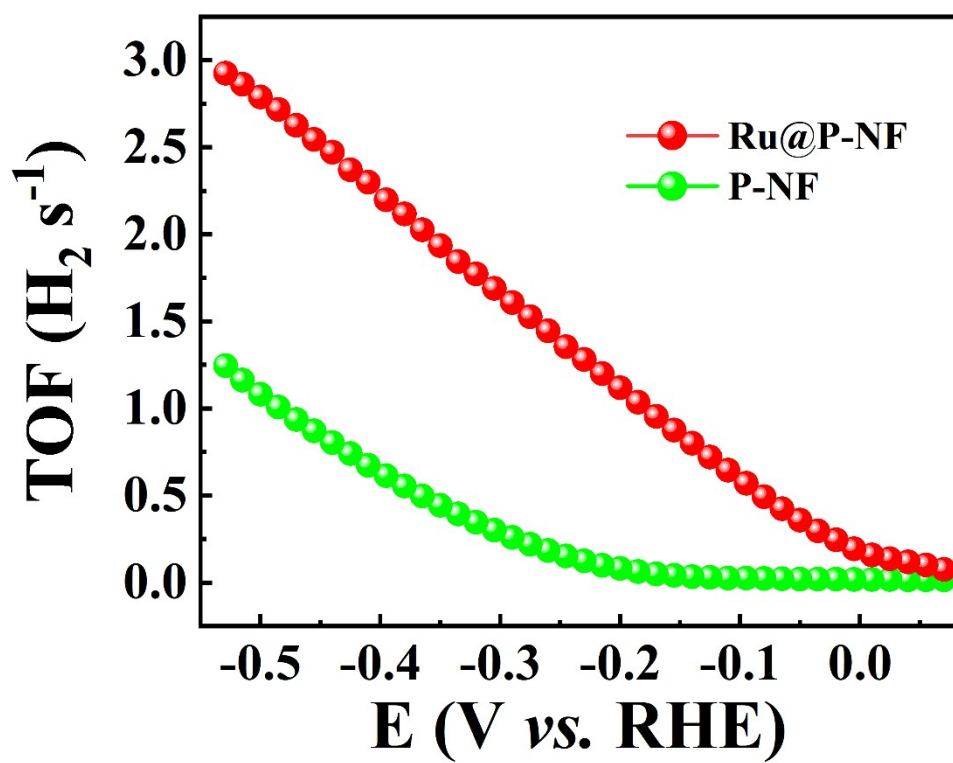

**Figure S12** Calculated TOF curves of Ru@P-NF and P-NF electrodes.

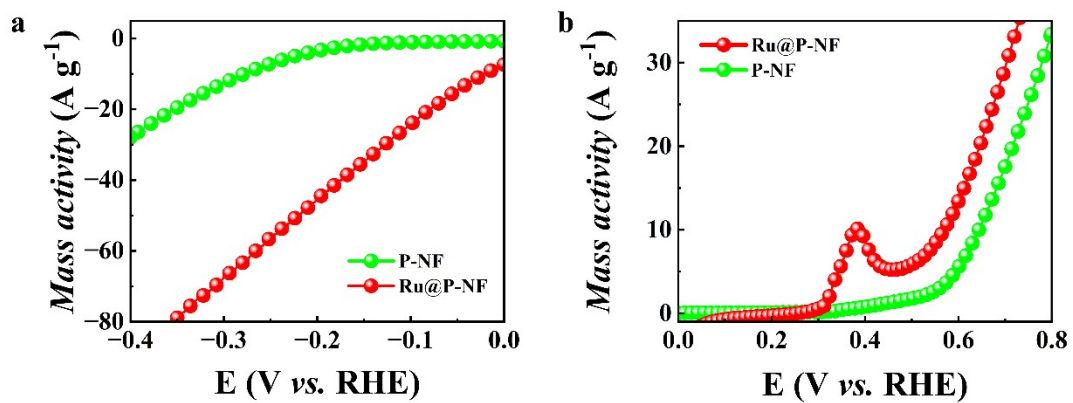

**Figure S13** (a) HER Mass-normalization curves. (b) OER Mass-normalization curves.

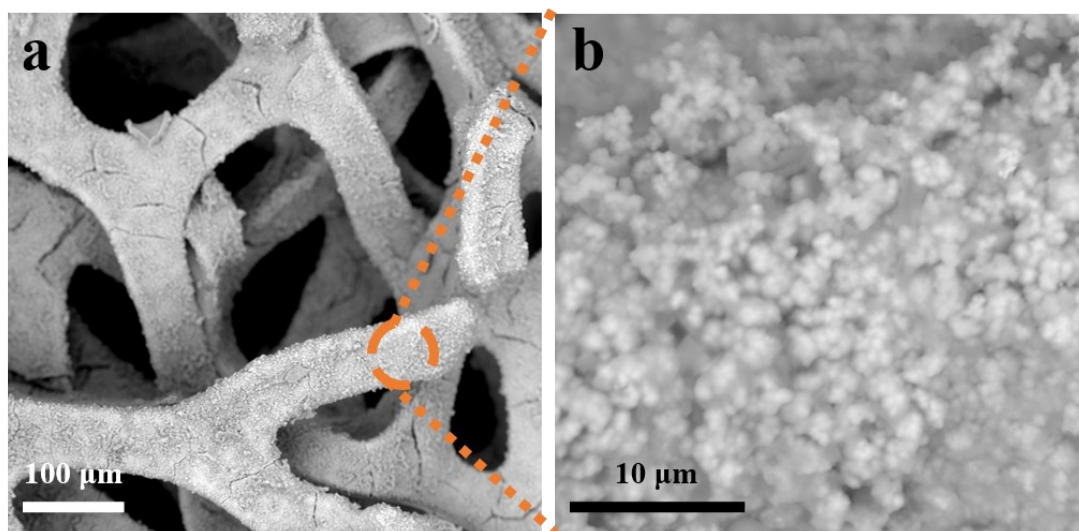

**Figure S14** SEM images of post-HER Ru@P-NF electrode.

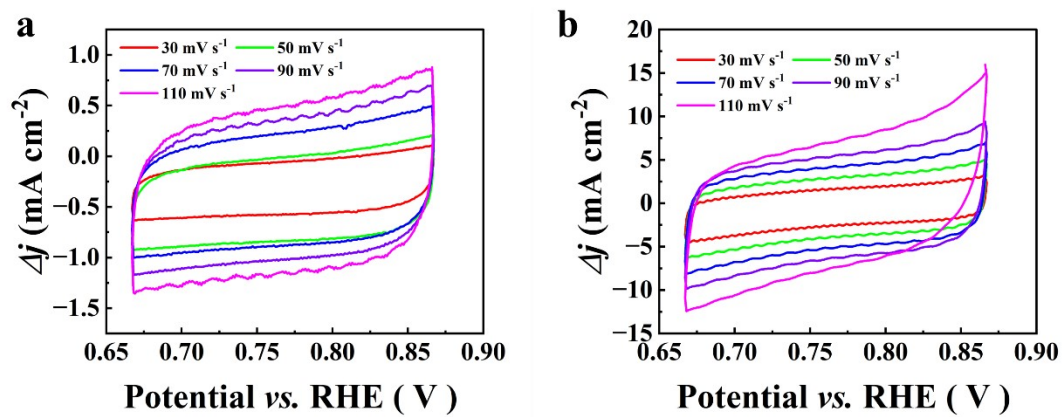

**Figure S15** CV curves within a non-faradaic reaction region at different scan rates toward OER process for (a) P-NF and (b) Ru@P-NF electrodes.

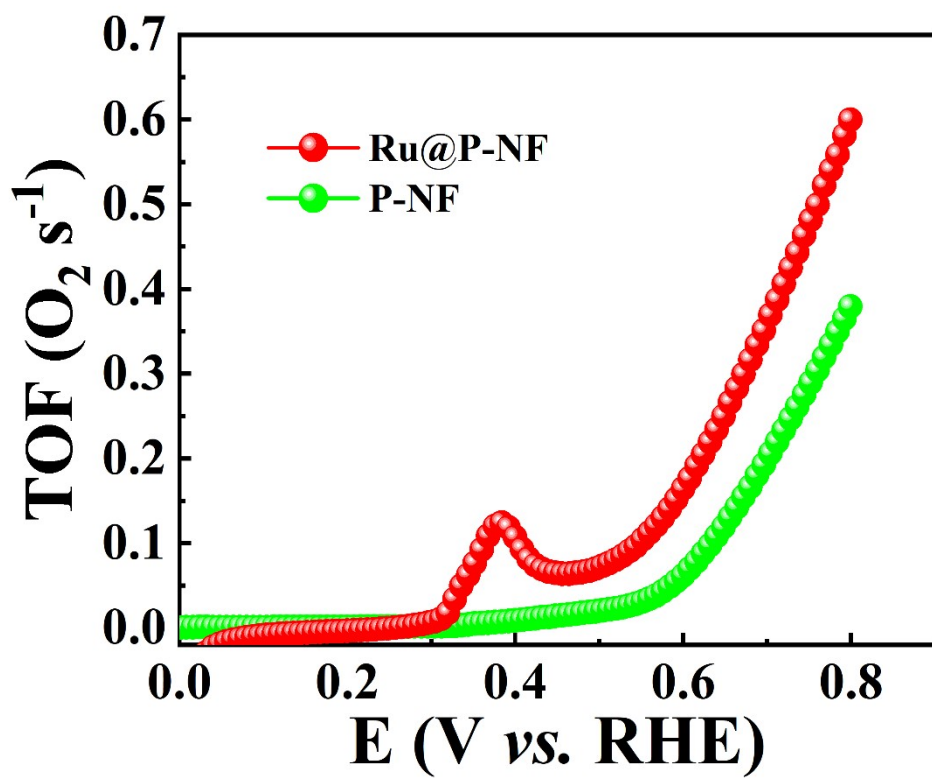

**Figure S16** Calculated TOF curves of Ru@P-NF, and P-NF.



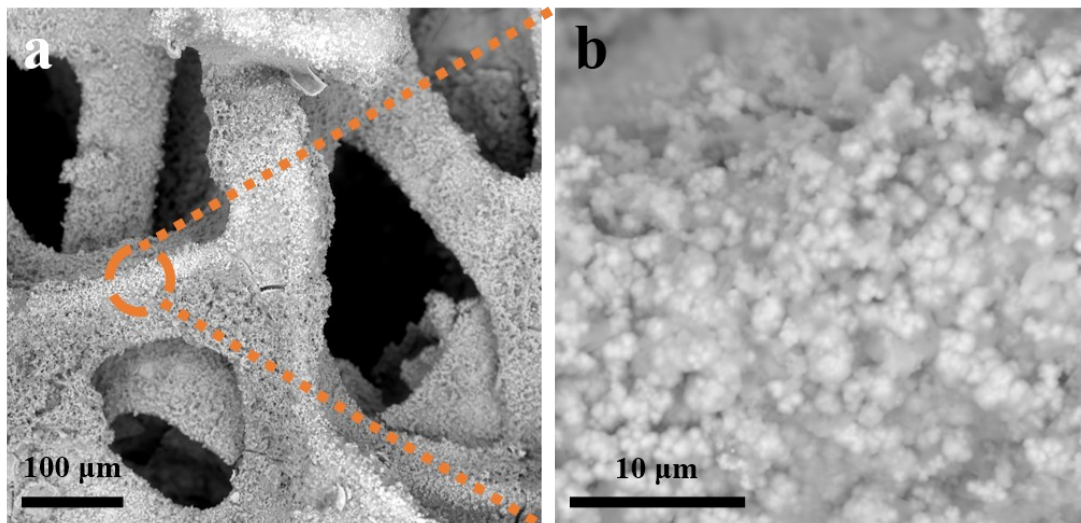

**Figure S17** SEM images of post-OER Ru@P-NF electrode.

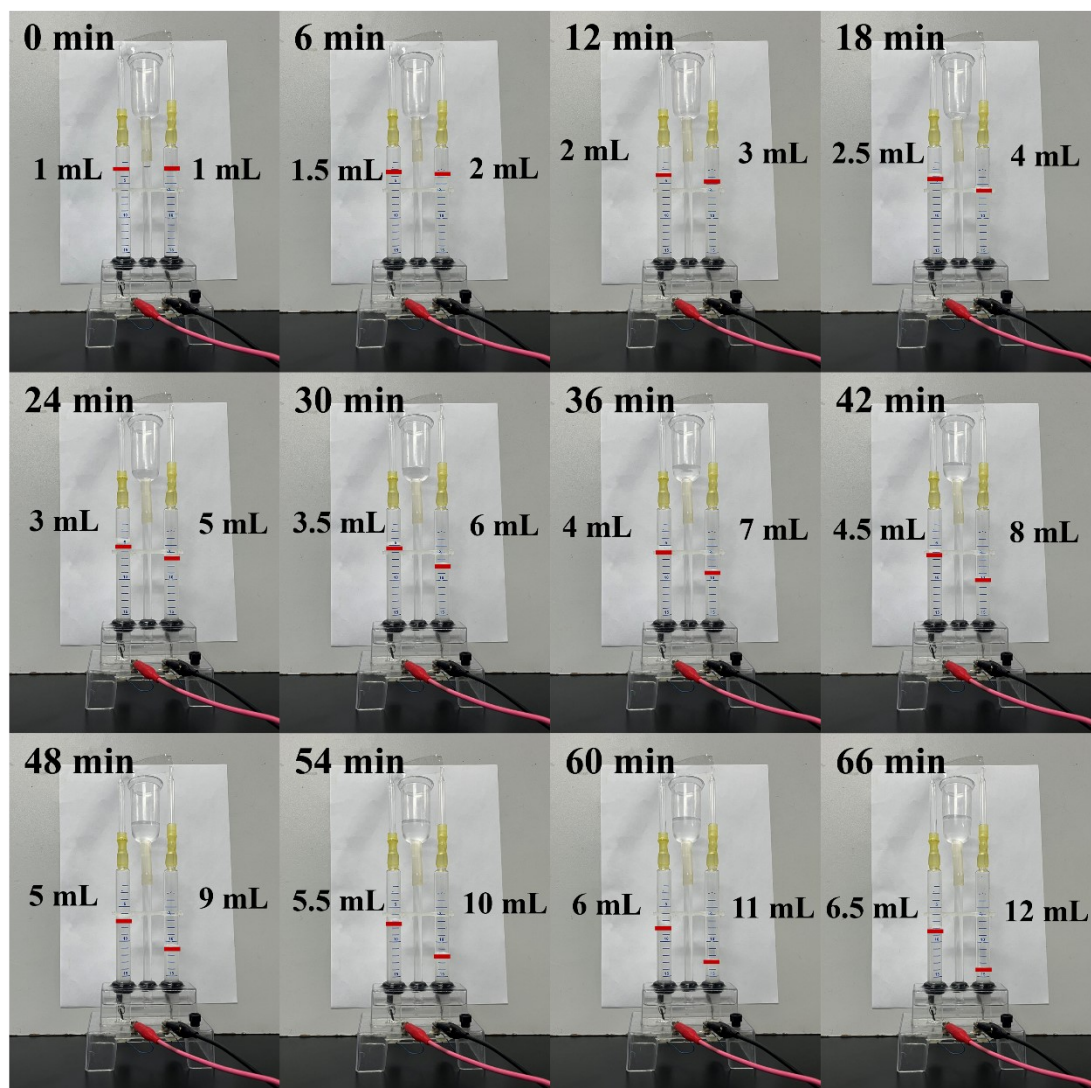

**Figure S18** Faradaic efficiency experiment at the current density of  $100 \text{ mA cm}^{-2}$ .

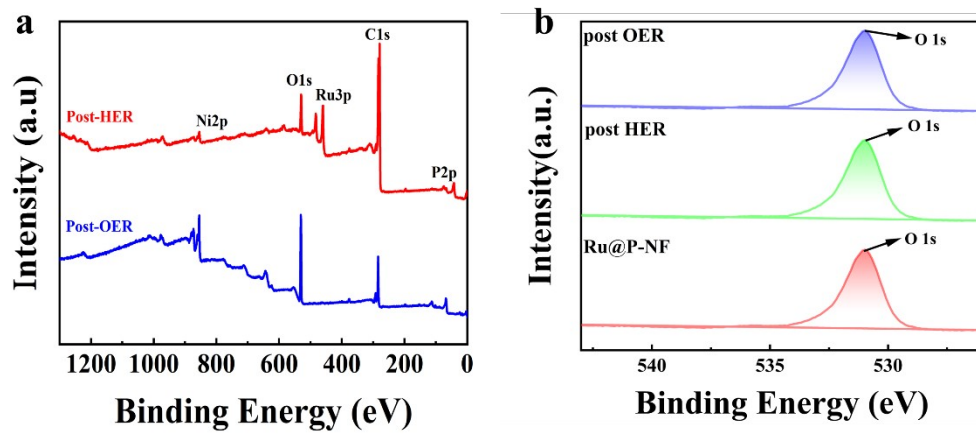

**Figure S19** (a) XPS survey spectra of Ru@P-NF. (b) X-ray Photoelectron Spectroscopy for Ru@P-NF and post HER/OER Ni 2p orbit.

## Supporting Tables

**Table S1.** Comparison the HER performance of Ru@P-NF with other electrocatalysts in 1.0 M KOH + 0.5 M NaCl.

| Catalyst                                             | Overpotential      | Electrolyte                           | References |
|------------------------------------------------------|--------------------|---------------------------------------|------------|
| Ru@P-NF                                              | $\eta_{100}=32$ mV | 1.0 M KOH + 0.5 M NaCl                | This work  |
| Ru-MnFeP/NF                                          | $\eta_{10}=35$ mV  | 1.0 M KOH + 0.5 M NaCl                | 1          |
| Mo-NiS <sub>x</sub> /NF                              | $\eta_{10}=136$ mV | 1.0 M KOH + 0.5 M NaCl                | 2          |
| NF/Ni <sub>3</sub> S <sub>2</sub> /MnS               | $\eta_{10}=45$ mV  | 1.0 M KOH + 0.5 M NaCl                | 3          |
| Ru-NiCoP/NF                                          | $\eta_{10}=44$ mV  | 1.0 M KOH + 0.5 M NaCl                | 4          |
| RuIr-NC                                              | $\eta_{10}=46$ mV  | 0.05 M H <sub>2</sub> SO <sub>4</sub> | 5          |
| Co-RuIr                                              | $\eta_{10}=14$ mV  | 0.1 M HClO <sub>4</sub>               | 6          |
| Ru <sub>0.5</sub> Ir <sub>0.5</sub>                  | $\eta_{10}=28$ mV  | 1.0 M KOH                             | 7          |
| RuCu NSs/C                                           | $\eta_{10}=20$ mV  | 1.0 M KOH                             | 8          |
| RuIrTe NTs                                           | $\eta_{10}=29$ mV  | 0.5 M H <sub>2</sub> SO <sub>4</sub>  | 9          |
| Fe <sub>x</sub> Ni <sub>3-x</sub> S <sub>2</sub> @NF | $\eta_{10}=72$ mV  | 1.0 M KOH + 0.5 M NaCl                | 10         |
| FeB <sub>2</sub>                                     | $\eta_{10}=61$ mV  | 1.0 M KOH + 0.5 M NaCl                | 11         |
| Fe-Ni <sub>2</sub> P@C/NF                            | $\eta_{10}=75$ mV  | 1.0 M KOH + 0.5 M NaCl                | 12         |
| Er-NiCoP/NF                                          | $\eta_{10}=46$ mV  | 1.0 M KOH + 0.5 M NaCl                | 13         |
| F <sub>0.25</sub> C <sub>1</sub> CH/NF               | $\eta_{10}=77$ mV  | 1.0 M KOH + 0.5 M NaCl                | 14         |
| P-CoFe-LDH@MXene/NF                                  | $\eta_{10}=85$ mV  | 1.0 M KOH + 0.5 M NaCl                | 15         |
| Co-VO <sub>x</sub> -P                                | $\eta_{10}=98$ mV  | 1.0 M KOH + 0.5 M NaCl                | 16         |

---

|                                           |                      |                        |    |
|-------------------------------------------|----------------------|------------------------|----|
| NiCo-LDH                                  | $\eta_{10}=168$ mV   | 1.0 M KOH + 0.5 M NaCl | 17 |
| Ru-G/CC                                   | $\eta_{10}=40$ mV    | 1.0 M KOH + 0.5 M NaCl | 18 |
| NiSe@CNTs                                 | $\eta_{10}=27$ mV    | 1.0 M KOH + 0.5 M NaCl | 19 |
| W <sub>2</sub> N/WC                       | $\eta_{10}=148.5$ mV | 1.0 M KOH + 0.5 M NaCl | 20 |
| MoS <sub>2</sub>                          | $\eta_{10}=48$ mV    | 1.0 M KOH + 0.5 M NaCl | 21 |
| CS-NFO@PNC-700                            | $\eta_{10}=200$ mV   | 1.0 M KOH + 0.5 M NaCl | 22 |
| Fe-Ni <sub>3</sub> P <sub>4</sub> /NiFeOH | $\eta_{10}=197$ mV   | 1.0 M KOH + 0.5 M NaCl | 23 |
| W-NiS <sub>0.5</sub> Se <sub>0.5</sub>    | $\eta_{10}=39$ mV    | 1.0 M KOH + 0.5 M NaCl | 24 |
| FeOOH/Ni <sub>3</sub> N                   | $\eta_{10}=67$ mV    | 1.0 M KOH + 0.5 M NaCl | 25 |

---

**Table S2.** Comparison the OER performance of Ru@P-NF with other electrocatalysts in 1.0 M KOH + 0.5 M NaCl.

| Catalyst                                | Overpotential        | Electrolyte                           | Reference |
|-----------------------------------------|----------------------|---------------------------------------|-----------|
| Ru@P-NF                                 | $\eta_{10}$ =153 mV  | 1.0 M KOH + 0.5 M NaCl                | This work |
| Ru-MnFeP/NF                             | $\eta_{20}$ =191 mV  | 1.0 M KOH + 0.5 M NaCl                | 1         |
| Mo-NiS <sub>x</sub> /NF                 | $\eta_{50}$ =307 mV  | 1.0 M KOH + 0.5 M NaCl                | 2         |
| NF/Ni <sub>3</sub> S <sub>2</sub> /MnS  | $\eta_{100}$ =245 mV | 1.0 M KOH + 0.5 M NaCl                | 3         |
| Ru-NiCoP/NF                             | $\eta_{20}$ =216 mV  | 1.0 M KOH + 0.5 M NaCl                | 4         |
| RuIr-NC                                 | $\eta_{10}$ =165 mV  | 0.05 M H <sub>2</sub> SO <sub>4</sub> | 5         |
| Co-RuIr                                 | $\eta_{10}$ =235 mV  | 0.1 M HClO <sub>4</sub>               | 6         |
| Ru <sub>0.5</sub> Ir <sub>0.5</sub>     | $\eta_{10}$ =176 mV  | 1.0 M KOH                             | 7         |
| RuCu NSs/C                              | $\eta_{10}$ =234 mV  | 1.0 M KOH                             | 8         |
| RuIrTe NTs                              | $\eta_{10}$ =205 mV  | 0.5 M H <sub>2</sub> SO <sub>4</sub>  | 9         |
| (cannot be measured stably)             |                      |                                       |           |
| FexNi <sub>3-x</sub> S <sub>2</sub> @NF | $\eta_{100}$ =252 mV | 1.0 M KOH + 0.5 M NaCl                | 10        |
| FeB <sub>2</sub>                        | $\eta_{10}$ =296 mV  | 1.0 M KOH + 0.5 M NaCl                | 11        |
| Fe-Ni <sub>2</sub> P@C/NF               | $\eta_{400}$ =269 mV | 1.0 M KOH + 0.5 M NaCl                | 12        |
| Er-NiCoP/NF                             | $\eta_{10}$ =225 mV  | 1.0 M KOH + 0.5 M NaCl                | 13        |
| F <sub>0.25</sub> C <sub>1</sub> CH/NF  | $\eta_{10}$ =228 mV  | 1.0 M KOH + 0.5 M NaCl                | 14        |
| P-CoFe-LDH@MXene/NF                     | $\eta_{200}$ =252 mV | 1.0 M KOH + 0.5 M NaCl                | 15        |
| Co-VO <sub>x</sub> -P                   | $\eta_{100}$ =230 mV | 1.0 M KOH + 0.5 M NaCl                | 16        |

---

|                                           |                     |                        |    |
|-------------------------------------------|---------------------|------------------------|----|
| NiCo-LDH                                  | $\eta_{30}=278$ mV  | 1.0 M KOH + 0.5 M NaCl | 17 |
| Ru-G/CC                                   | $\eta_{10}=270$ mV  | 1.0 M KOH + 0.5 M NaCl | 18 |
| Ni-Fe-Se / NF                             | $\eta_{100}=222$ mV | 1.0 M KOH + 0.5 M NaCl | 19 |
| W <sub>2</sub> N/WC                       | $\eta_{10}=320$ mV  | 1.0 M KOH + 0.5 M NaCl | 20 |
| MoS <sub>2</sub>                          | $\eta_{10}=260$ mV  | 1.0 M KOH + 0.5 M NaCl | 21 |
| CS-NFO@PNC-700                            | $\eta_{10}=217$ mV  | 1.0 M KOH + 0.5 M NaCl | 22 |
| Fe-Ni <sub>5</sub> P <sub>4</sub> /NiFeOH | $\eta_{10}=221$ mV  | 1.0 M KOH + 0.5 M NaCl | 23 |
| W-NiS <sub>0.5</sub> Se <sub>0.5</sub>    | $\eta_{10}=171$ mV  | 1.0 M KOH + 0.5 M NaCl | 24 |
| FeOOH/Ni <sub>3</sub> N                   | $\eta_{10}=224$ mV  | 1.0 M KOH + 0.5 M NaCl | 25 |

---

**Table S3.** The overall-water splitting performance for Ru@P-NF electrode and other electrodes with non-noble-metal electrocatalysts in 1.0 M KOH + 0.5 M NaCl.

| Catalyst                                             | Overpotential       | Electrolyte                           | References |
|------------------------------------------------------|---------------------|---------------------------------------|------------|
| Ru@P-NF                                              | $\eta_{20}=1.42$ V  | 1.0 M KOH + 0.5 M NaCl                | This work  |
| Ru-MnFeP/NF                                          | $\eta_{10}=1.47$ V  | 1.0 M KOH + 0.5 M NaCl                | 1          |
| Mo-NiS <sub>x</sub> /NF                              | $\eta_{10}=1.594$ V | 1.0 M KOH + 0.5 M NaCl                | 2          |
| NF/Ni <sub>3</sub> S <sub>2</sub> /MnS               | $\eta_{20}=1.53$ V  | 1.0 M KOH + 0.5 M NaCl                | 3          |
| Ru-NiCoP/NF                                          | $\eta_{10}=1.515$ V | 1.0 M KOH + 0.5 M NaCl                | 4          |
| RuIr-NC                                              | $\eta_{10}=1.485$ V | 0.05 M H <sub>2</sub> SO <sub>4</sub> | 5          |
| Co-RuIr                                              | $\eta_{10}=1.52$ V  | 0.1 M HClO <sub>4</sub>               | 6          |
| Ru <sub>0.5</sub> Ir <sub>0.5</sub>                  | $\eta_{10}=1.48$ V  | 1.0 M KOH                             | 7          |
| RuCu NSs/C                                           | $\eta_{10}=1.49$ V  | 1.0 M KOH                             | 8          |
| RuIrTe NTs                                           | $\eta_{10}=1.511$ V | 0.5 M H <sub>2</sub> SO <sub>4</sub>  | 9          |
| Fe <sub>x</sub> Ni <sub>3-x</sub> S <sub>2</sub> @NF | $\eta_{10}=1.51$ V  | 1.0 M KOH + 0.5 M NaCl                | 10         |
| FeB <sub>2</sub>                                     | $\eta_{10}=1.57$ V  | 1.0 M KOH + 0.5 M NaCl                | 11         |
| Fe-Ni <sub>2</sub> P@C/NF                            | $\eta_{100}=1.55$ V | 1.0 M KOH + 0.5 M NaCl                | 12         |
| FeP <sub>x</sub> /Fe-N-C/NPC                         | $\eta_{10}=1.58$ V  | 1.0 M KOH + 0.5 M NaCl                | 26         |
| F <sub>0.25</sub> C <sub>1</sub> CH/NF               | $\eta_{10}=1.45$ V  | 1.0 M KOH + 0.5 M NaCl                | 14         |
| P-CoFe-LDH@MXene/NF                                  | $\eta_{10}=1.52$ V  | 1.0 M KOH + 0.5 M NaCl                | 15         |
| Fe-doped CoP nanoarray                               | $\eta_{10}=1.6$ V   | 1.0 M KOH + 0.5 M NaCl                | 27         |
| NiCo-LDH                                             | $\eta_{10}=1.63$ V  | 1.0 M KOH + 0.5 M NaCl                | 17         |



---

|                                                       |                      |                        |    |
|-------------------------------------------------------|----------------------|------------------------|----|
| Ni-MoO <sub>2</sub> /NF-                              |                      |                        |    |
| IH and NiFe LDH/NF-IH                                 | $\eta_{10}=1.5$ V    | 1.0 M KOH + 0.5 M NaCl | 28 |
| NiSe@CNTs                                             | $\eta_{500}=1.72$ V  | 1.0 M KOH + 0.5 M NaCl | 13 |
| Ni <sub>3</sub> N-NiMoN catalysts                     | $\eta_{10}=1.54$ V   | 1.0 M KOH + 0.5 M NaCl | 29 |
| MoS <sub>2</sub>                                      | $\eta_{10}=1.45$ V   | 1.0 M KOH + 0.5 M NaCl | 21 |
| CS-NFO@PNC-700                                        | $\eta_{500}=1.861$ V | 1.0 M KOH + 0.5 M NaCl | 22 |
| Fe-Ni <sub>5</sub> P <sub>4</sub> /NiFeOH             | $\eta_{10}=1.55$ V   | 1.0 M KOH + 0.5 M NaCl | 23 |
| Co <sub>4</sub> S <sub>3</sub> /Mo <sub>2</sub> C-NSC | $\eta_{10}=1.62$ V   | 1.0 M KOH + 0.5 M NaCl | 30 |
| FeOOH/Ni <sub>3</sub> N                               | $\eta_{10}=1.56$ V   | 1.0 M KOH + 0.5 M NaCl | 25 |

---

## References

- 1 D. Chen, Z. Pu, R. Lu, P. Ji, P. Wang, J. Zhu, C. Lin, H. Li, X. Zhou, Z. Hu, F. Xia, J. Wu, S. Mu. Ultralow Ru Loading Transition Metal Phosphides as High-Efficient Bifunctional Electrocatalyst for a Solar-to-Hydrogen Generation System[J]. *Advanced Energy Materials*, 2020, 10(28): 2000814.
- 2 Y. Zhang, M. Chen, P. Guo, Y. Du, B. Song, X. Wang, Z. Jiang, P. Xu. *Retracted*: Magnetic field-enhanced water splitting enabled by bifunctional molybdenum-doped nickel sulfide on nickel foam[J]. *Carbon Energy*, 2023: e351.
- 3 Y. Zhang, J. Fu, H. Zhao, R. Jiang, F. Tian, R. Zhang. Tremella-like Ni<sub>3</sub>S<sub>2</sub>/MnS with ultrathin nanosheets and abundant oxygen vacancies directly used for high speed overall water splitting[J]. *Applied Catalysis B: Environmental*, 2019, 257: 117899.
- 4 D. Chen, R. Lu, Z. Pu, J. Zhu, H.-W. Li, F. Liu, S. Hu, X. Luo, J. Wu, Y. Zhao, S. Mu. Ru-doped 3D flower-like bimetallic phosphide with a climbing effect on overall water splitting[J]. *Applied Catalysis B: Environmental*, 2020, 279: 119396.
- 5 D. Wu, K. Kusada, S. Yoshioka, T. Yamamoto, T. Toriyama, S. Matsumura, Y. Chen, O. Seo, J. Kim, C. Song, S. Hiroi, O. Sakata, T. Ina, S. Kawaguchi, Y. Kubota, H. Kobayashi, H. Kitagawa. Efficient overall water splitting in acid with anisotropic metal nanosheets[J]. *Nature Communications*, 2021, 12(1): 1145.
- 6 J. Shan, T. Ling, K. Davey, Y. Zheng, S. Qiao. Transition-Metal-Doped RuIr Bifunctional Nanocrystals for Overall Water Splitting in Acidic Environments[J]. *Advanced Materials*, 2019, 31(17): 1900510.
- 7 Y. Jiang, Y. Mao, Y. Jiang, H. Liu, W. Shen, M. Li, R. He. Atomic equidistribution enhanced RuIr electrocatalysts for overall water splitting in the whole pH range[J]. *Chemical Engineering Journal*, 2022, 450: 137909.
- 8 Q. Yao, B. Huang, N. Zhang, M. Sun, Q. Shao, X. Huang. Channel-Rich RuCu Nanosheets for pH-Universal Overall Water Splitting Electrocatalysis[J]. *Angewandte Chemie*, 2019, 131(39): 14121–14126.
- 9 M. Liu, S. Liu, Q. Mao, S. Yin, Z. Wang, Y. Xu, X. Li, L. Wang, H. Wang. Ultrafine ruthenium–iridium–tellurium nanotubes for boosting overall water splitting in acidic media[J]. *Journal of Materials Chemistry A*, 2022, 10(4): 2021–2026.
- 10 B. Fei, Z. Chen, J. Liu, H. Xu, X. Yan, H. Qing, M. Chen, R. Wu. Ultrathinning Nickel Sulfide with Modulated Electron Density for Efficient Water Splitting[J]. *Advanced Energy Materials*, 2020, 10(41): 2001963.
- 11 H. Li, P. Wen, Q. Li, C. Dun, J. Xing, C. Lu, S. Adhikari, L. Jiang, D. L. Carroll, S. M. Geyer. *Retracted*: Earth-Abundant Iron Diboride (FeB<sub>2</sub>) Nanoparticles as Highly Active Bifunctional Electrocatalysts for Overall Water Splitting[J]. *Advanced Energy Materials*, 2017, 7(17): 1700513.
- 12 D. Li, Z. Li, R. Zou, G. Shi, Y. Huang, W. Yang, W. Yang, C. Liu, X. Peng. Coupling overall water splitting and biomass oxidation via Fe-doped Ni<sub>2</sub>P@C nanosheets at large current density[J]. *Applied Catalysis B: Environmental*, 2022, 307: 121170.
- 13 H. Zhang, A. Aierke, Y. Zhou, Z. Ni, L. Feng, A. Chen, T. Wågberg, G. Hu. A

- high-performance transition-metal phosphide electrocatalyst for converting solar energy into hydrogen at 19.6% STH efficiency[J]. *Carbon Energy*, 2023, 5(1): e217.
- 14 L. Hui, Y. Xue, D. Jia, H. Yu, C. Zhang, Y. Li. Multifunctional Single-Crystallized Carbonate Hydroxides as Highly Efficient Electrocatalyst for Full Water splitting[J]. *Advanced Energy Materials*, 2018, 8(20): 1800175.
  - 15 L. Deng, K. Zhang, D. Shi, S. Liu, D. Xu, Y. Shao, J. Shen, Y. Wu, X. Hao. Rational design of Schottky heterojunction with modulating surface electron density for high-performance overall water splitting[J]. *Applied Catalysis B: Environmental*, 2021, 299: 120660.
  - 16 Z. Zhu, K. Xu, W. Guo, H. Zhang, X. Xiao, M. He, T. Yu, H. Zhao, D. Zhang, T. Yang. Vanadium-phosphorus incorporation induced interfacial modification on cobalt catalyst and its super electrocatalysis for water splitting in alkaline media[J]. *Applied Catalysis B: Environmental*, 2022, 304: 120985.
  - 17 J. Yan, L. Chen, X. Liang. Co<sub>9</sub>S<sub>8</sub> nanowires@NiCo LDH nanosheets arrays on nickel foams towards efficient overall water splitting[J]. *Science Bulletin*, 2019, 64(3): 158–165.
  - 18 M. You, X. Du, X. Hou, Z. Wang, Y. Zhou, H. Ji, L. Zhang, Z. Zhang, S. Yi, D. Chen. In-situ growth of ruthenium-based nanostructure on carbon cloth for superior electrocatalytic activity towards HER and OER[J]. *Applied Catalysis B: Environmental*, 2022, 317: 121729.
  - 19 H. Xue, T. Yang, Z. Zhang, Y. Zhang, Z. Geng, Y. He. Stimulate the hidden catalysis potential and exposure of nickel site in NiSe@CNTs result in ultra-high HER/OER activity and stability[J]. *Applied Catalysis B: Environmental*, 2023, 330: 122641.
  - 20 J. Diao, Y. Qiu, S. Liu, W. Wang, K. Chen, H. Li, W. Yuan, Y. Qu, X. Guo. Interfacial Engineering of W<sub>2</sub>N/WC Heterostructures Derived from Solid-State Synthesis: A Highly Efficient Trifunctional Electrocatalyst for ORR, OER, and HER[J]. *Advanced Materials*, 2020, 32(7): 1905679.
  - 21 Q. Xiong, Y. Wang, P. Liu, L. Zheng, G. Wang, H. Yang, P. Wong, H. Zhang, H. Zhao. Cobalt Covalent Doping in MoS<sub>2</sub> to Induce Bifunctionality of Overall Water Splitting[J]. *Advanced Materials*, 2018, 30(29): 1801450.
  - 22 S. Ramakrishnan, D. B. Velusamy, S. Sengodan, G. Nagaraju, D. H. Kim, A. R. Kim, D. J. Yoo. Rational design of multifunctional electrocatalyst: An approach towards efficient overall water splitting and rechargeable flexible solid-state zinc–air battery[J]. *Applied Catalysis B: Environmental*, 2022, 300: 120752.
  - 23 C.-F. Li, J.-W. Zhao, L.-J. Xie, J.-Q. Wu, G.-R. Li. Fe doping and oxygen vacancy modulated Fe-Ni<sub>5</sub>P<sub>4</sub>/NiFeOH nanosheets as bifunctional electrocatalysts for efficient overall water splitting[J]. *Applied Catalysis B: Environmental*, 2021, 291: 119987.
  - 24 Y. Wang, X. Li, M. Zhang, J. Zhang, Z. Chen, X. Zheng, Z. Tian, N. Zhao, X. Han, K. Zaghib, Y. Wang, Y. Deng, W. Hu. Highly Active and Durable Single-Atom Tungsten-Doped NiS<sub>0.5</sub>Se<sub>0.5</sub> Nanosheet @ NiS<sub>0.5</sub>Se<sub>0.5</sub> Nanorod Heterostructures for Water Splitting[J]. *Advanced Materials*, 2022, 34(13): 2107053.

- 25 J. Guan, C. Li, J. Zhao, Y. Yang, W. Zhou, Y. Wang, G.-R. Li. FeOOH-enhanced bifunctionality in Ni<sub>3</sub>N nanotube arrays for water splitting[J]. *Applied Catalysis B: Environmental*, 2020, 269: 118600.
- 26 Q. Qin, H. Jang, P. Li, B. Yuan, X. Liu, J. Cho. A Tannic Acid-Derived N-, P-Codoped Carbon-Supported Iron-Based Nanocomposite as an Advanced Trifunctional Electrocatalyst for the Overall Water Splitting Cells and Zinc-Air Batteries[J]. *Advanced Energy Materials*, 2019, 9(5): 1803312.
- 27 C. Tang, R. Zhang, W. Lu, L. He, X. Jiang, A. M. Asiri, X. Sun. Fe-Doped CoP Nanoarray: A Monolithic Multifunctional Catalyst for Highly Efficient Hydrogen Generation[J]. *Advanced Materials*, 2017, 29(2): 1602441.
- 28 G. Xiong, Y. Chen, Z. Zhou, F. Liu, X. Liu, L. Yang, Q. Liu, Y. Sang, H. Liu, X. Zhang, J. Jia, W. Zhou. Rapid Synthesis of Various Electrocatalysts on Ni Foam Using a Universal and Facile Induction Heating Method for Efficient Water Splitting[J]. *Advanced Functional Materials*, 2021, 31(15): 2009580.
- 29 A. Wu, Y. Xie, H. Ma, C. Tian, Y. Gu, H. Yan, X. Zhang, G. Yang, H. Fu. Integrating the active OER and HER components as the heterostructures for the efficient overall water splitting[J]. *Nano Energy*, 2018, 44: 353–363.
- 30 Y. Liu, X. Luo, C. Zhou, S. Du, D. Zhen, B. Chen, J. Li, Q. Wu, Y. Iru, D. Chen. A modulated electronic state strategy designed to integrate active HER and OER components as hybrid heterostructures for efficient overall water splitting[J]. *Applied Catalysis B: Environmental*, 2020, 260: 118197.
